# Supplementary material for: High-capacity poly(2-oxazoline) formulation of TLR 7/8 agonist extends survival in a chemo-insensitive, metastatic model of lung adenocarcinoma
Source: PubMed Central journal article supplement — Sci Adv. 2020 Jun 17;6(25):eaba5542. doi: 10.1126/sciadv.aba5542 (PMC7299629; doi:10.1126/sciadv.aba5542), 2020-06-17
Supplement: aba5542_SM.pdf [file aba5542_SM.pdf]

## Supplementary Materials for

### **High-capacity poly(2-oxazoline) formulation of TLR 7/8 agonist extends survival in a chemo-insensitive, metastatic model of lung adenocarcinoma**

Natasha Vinod, Duhyeong Hwang, Salma H. Azam, Amanda E. D. Van Swearingen, Elizabeth Wayne, Sloane Christian Fussell, Marina Sokolsky-Papkov, Chad V. Pecot\*, Alexander V. Kabanov\*

\*Corresponding author. Email: pecot@email.unc.edu (C.V.P.); kabanov@email.unc.edu (A.V.K.)

Published 17 June 2020, *Sci. Adv.* **6**, eaba5542 (2020)  
DOI: 10.1126/sciadv.aba5542

#### **This PDF file includes:**

Tables S1 and S2  
Figs. S1 to S5

**Table S1 | Characterization of POx micelles coloaded with anti-cancer agent and chemosensitizers  
mTOR kinase inhibitor (AZD8055) and anticancer agent (C<sub>6</sub>CP)**

| Feeding ratio<br>(g/L) | LE (%)            |         | LC (%)            |         | Tot  | Drug concentration in<br>solution (g/L) |         |
|------------------------|-------------------|---------|-------------------|---------|------|-----------------------------------------|---------|
|                        | C <sub>6</sub> CP | AZD8055 | C <sub>6</sub> CP | AZD8055 |      | C <sub>6</sub> CP                       | AZD8055 |
| 8/0/10                 | 70.6              | -       | 36.1              | -       | -    | 5.7                                     | -       |
| 0/8/10                 | -                 | 43.4    | -                 | 25.8    | -    | -                                       | 3.5     |
| 4/8/10                 | 22.0              | 39.13   | 6.28              | 22.3    | 28.6 | 0.9                                     | 3.1     |
| 6/6/10                 | 83.2              | 91.2    | 24.38             | 26.7    | 51.1 | 5.0                                     | 5.5     |
| 8/4/10                 | 85.3              | 91.0    | 33.33             | 17.8    | 51.1 | 6.8                                     | 3.7     |
| 9/3/10                 | 80.2              | 102.0   | 35.6              | 15.1    | 50.7 | 7.2                                     | 3.1     |

  

| Feeding ratio<br>(g/L) | LE (%) |        | LC (%) |        | Tot  | Drug concentration in<br>solution (g/L) |        |
|------------------------|--------|--------|--------|--------|------|-----------------------------------------|--------|
|                        | PTX    | VE-822 | PTX    | VE-822 |      | PTX                                     | VE-822 |
| 8/0/10                 | 86.9   | -      | 41.0   | -      | -    | 7.0                                     | -      |
| 0/8/10                 | -      | 83.3   | -      | 40.0   | -    | -                                       | 6.7    |
| 4/8/10                 | 83.8   | 77.8   | 17.1   | 31.9   | 48.9 | 3.4                                     | 6.2    |
| 6/6/10                 | 102.0  | 91.5   | 28.4   | 25.4   | 53.7 | 6.1                                     | 5.5    |
| 8/4/10                 | 97.0   | 89.3   | 36.4   | 16.7   | 53.1 | 7.8                                     | 3.6    |
| 9/3/10                 | 95.2   | 86.7   | 40.5   | 12.3   | 52.8 | 8.6                                     | 2.6    |

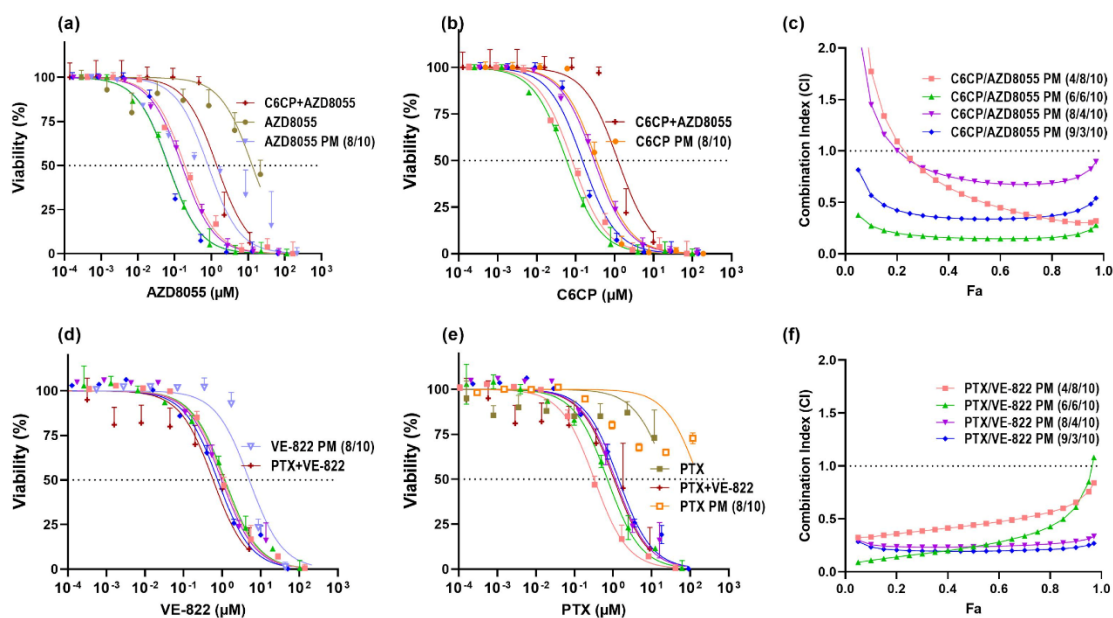

(g)

| Drug    | C6CP<br>IC <sub>50</sub><br>(μM) | AZD8055<br>IC <sub>50</sub><br>(μM) | C6CP PM<br>IC <sub>50</sub> (μM) | AZD8055<br>PM<br>IC <sub>50</sub> (μM) | IC <sub>50</sub> (μM)<br>C6CP/AZD8055 PM |        |        |        | IC <sub>50</sub> (μM)<br>C6CP +<br>AZD8055(4+8) |
|---------|----------------------------------|-------------------------------------|----------------------------------|----------------------------------------|------------------------------------------|--------|--------|--------|-------------------------------------------------|
|         |                                  |                                     |                                  |                                        | 4/8/10                                   | 6/6/10 | 8/4/10 | 9/3/10 |                                                 |
| AZD8055 | -                                | 12.99                               | -                                | 0.81                                   | 0.19                                     | 0.07   | 0.16   | 0.07   | 1.41                                            |
| C6CP    | -                                | -                                   | 0.27                             | -                                      | 0.08                                     | 0.06   | 0.30   | 0.15   | 1.224                                           |
| Drug    | PTX<br>IC <sub>50</sub><br>(μM)  | VE-822<br>IC <sub>50</sub><br>(μM)  | PTX PM<br>IC <sub>50</sub> (μM)  | VE-822<br>PM<br>IC <sub>50</sub> (μM)  | IC <sub>50</sub> (μM)<br>PTX/VE-822 PM   |        |        |        | IC <sub>50</sub> (μM)<br>PTX + VE-<br>822 (6+6) |
|         |                                  |                                     |                                  |                                        | 4/8/10                                   | 6/6/10 | 8/4/10 | 9/3/10 |                                                 |
| VE-822  | -                                | 5                                   | -                                | 3.05                                   | 1.09                                     | 1.18   | 0.97   | 0.77   | 0.58                                            |
| PTX     | 27.2                             | -                                   | 168.7                            | -                                      | 0.32                                     | 0.7    | 1.15   | 1.38   | 1.06                                            |

**Fig. S1. *In vitro* cytotoxicity of anticancer agent and chemosensitizers in 344SQ lung adenocarcinoma cell line** (a,b,d,e) Dose-response curves of free and micelle incorporated drugs and drug combinations in 344SQ cell line after 72h of treatment. Cell viability as a function of individual drug concentrations after treatment with a combination of the drugs AZD8055 and C6CP (a and b) and VE-822 and PTX (d and e). The data was fit into sigmodal curve using non-linear regression. Data represent mean  $\pm$  CV. n=6. (c, f) Fa-CI plots of the C<sub>6</sub>CP/AZD8055 and PTX/ VE-822 combinations. Data represent mean. n = 6. (g) Comparison of the IC<sub>50</sub> values of POx formulations and free drugs in 344SQ cell line.

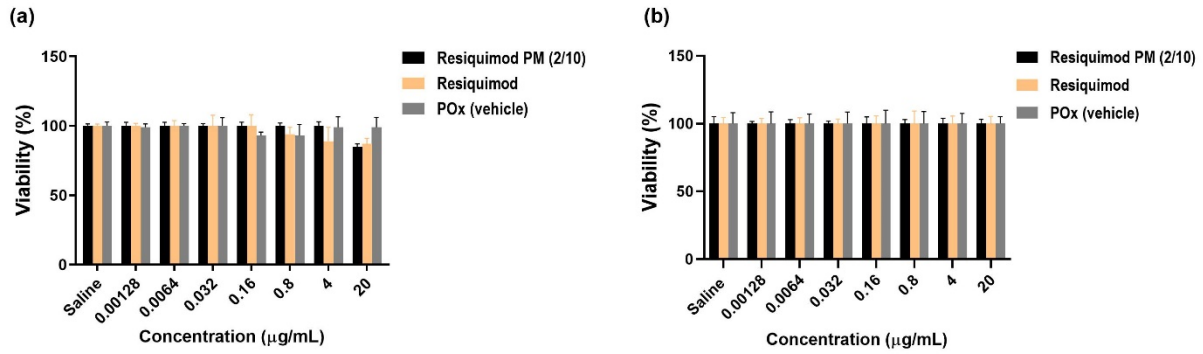

**Fig. S2. *In vitro* cytotoxicity of Resiquimod** Cell viability of (a) 344SQ following 24h treatment with Resiquimod PM, free Resiquimod and POx (vehicle). (b) BMDM following 24h treatment with Resiquimod PM, free Resiquimod and POx (vehicle). Data represent mean  $\pm$  CV. n = 6.

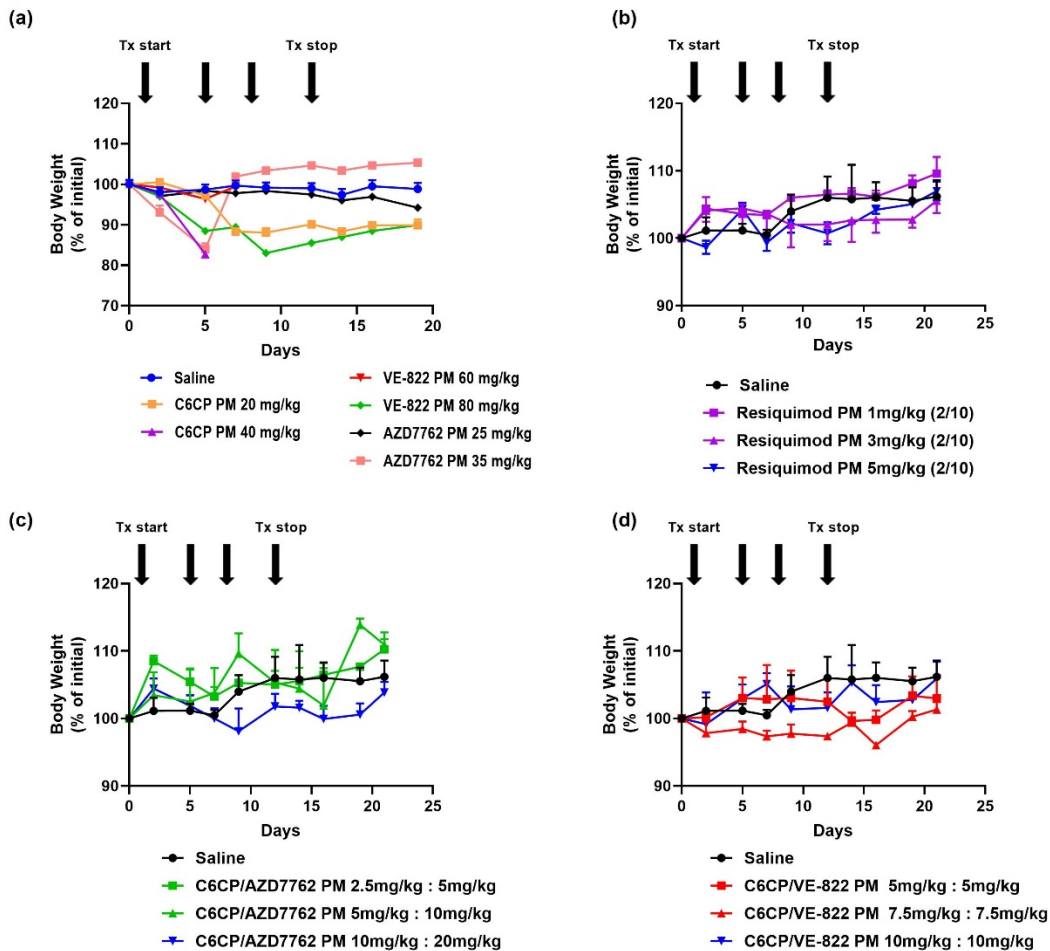

**Fig. S3. MTD study in healthy 129/Sv mice** Mice body weight (percent of initial) following four injections of a, b) Single agent POx micelles c) C<sub>6</sub>CP/AZD7762 PM d) C<sub>6</sub>CP/VE-822 PM (q4days x 4doses) and normal saline. A common control (saline) was used for b-d. Data represent mean  $\pm$  SEM. n = 3.

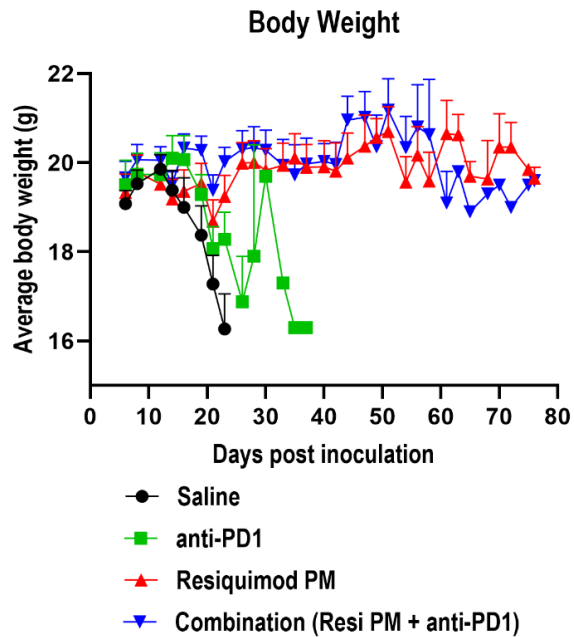

**Fig. S4.** Changes in the bodyweight of animals subjected to different treatments. Data represent mean  $\pm$  SEM. n = 3.

**Table S2 | Description of Antibody-Fluorochrome pairs**

| Myeloid Panel |             | Lymphoid Panel |             |
|---------------|-------------|----------------|-------------|
| Antibody      | Fluorophore | Antibody       | Fluorophore |
| Ly6C          | AF647       | CD45           | PE          |
| CD11b         | BV510       | CD8            | AF488       |
| CD11c         | APC/Cy7     | CD3            | AF594       |
| Ly6G          | AF594       | AF700          | AF700       |

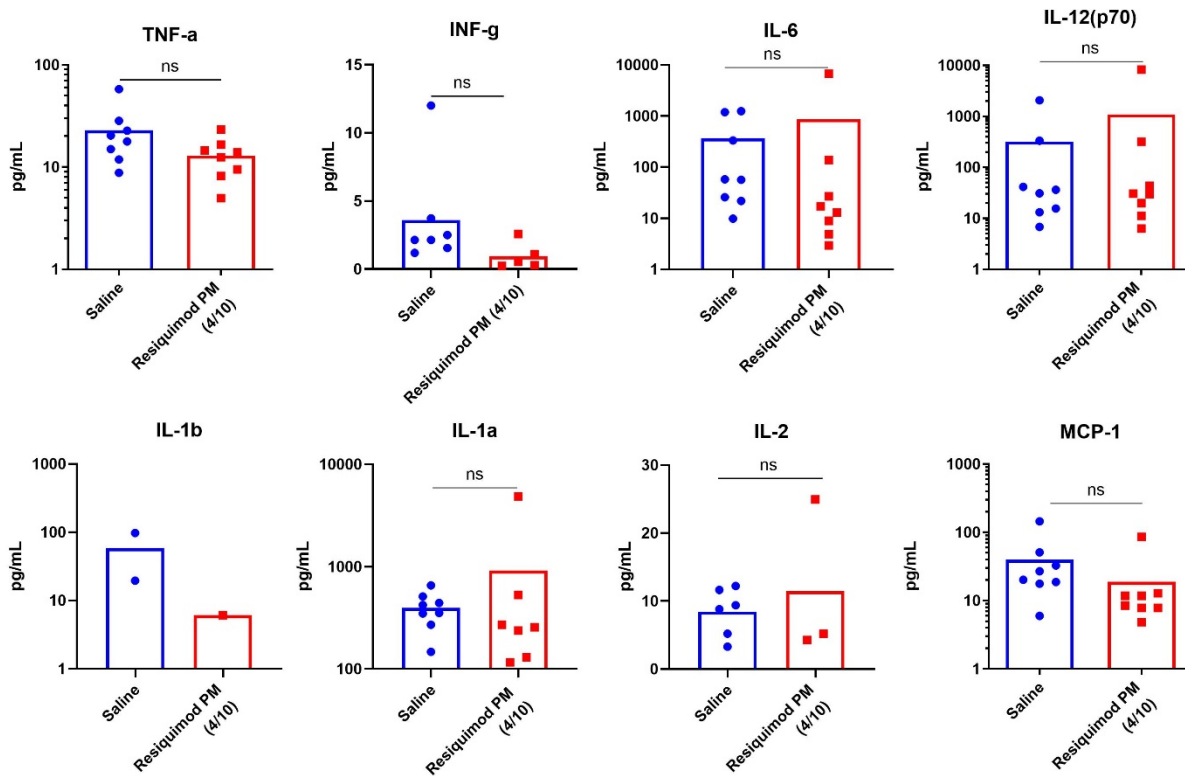

**Fig. S5.** Alterations in the pro-inflammatory cytokines/chemokines at 48 h following second treatment of Resiquimod PM (q4days x 2doses). n = 8. ns, not significant computed by unpaired student t test with Welch's correction. Significance level ( $\alpha$ ) was set at 0.05.
